# Supplementary material for: The effect of the dual scale surface topography of a surface-modified titanium alloy on its bactericidal activity against Pseudomonas aeruginosa
Source: Royal Society of Chemistry journal article supplement (doi:10.1039/d4ra07843h), 2025-01-01
Supplement: d4ra07843h1.pdf [file d4ra07843h1.pdf]

## Data availability

The data supporting this article have been included as part of the Supplementary Information.

## Supplementary Information

Table SI 1: Water contact angle values of the 7 groups of surfaces before and after subjected to hydrothermal treatment.

| Surface roughness ( $\mu\text{m Ra}$ ) | WCA ( $^\circ$ ) before hydrothermal |        |        |        |      | WCA ( $^\circ$ ) after hydrothermal |       |       |       |      |
|----------------------------------------|--------------------------------------|--------|--------|--------|------|-------------------------------------|-------|-------|-------|------|
|                                        | 1                                    | 2      | 3      | Mean   | SD   | 1                                   | 2     | 3     | Mean  | SD   |
| 1.44                                   | 82.48                                | 64.69  | 78.99  | 75.39  | 7.70 | 0                                   | 0     | 0     | 0.00  | 0.00 |
| 1.29                                   | 100.13                               | 94.41  | 78.24  | 90.93  | 9.27 | 10.19                               | 17.85 | 15.51 | 14.52 | 3.21 |
| 0.87                                   | 102.39                               | 95.25  | 95.71  | 97.78  | 3.26 | 19.9                                | 7.13  | 0     | 9.01  | 8.23 |
| 0.64                                   | 97.42                                | 103.12 | 101.86 | 100.80 | 2.44 | 0                                   | 0     | 0     | 0.00  | 0.00 |
| 0.40                                   | 102.97                               | 98.64  | 99.75  | 100.45 | 1.84 | 0                                   | 0     | 0     | 0.00  | 0.00 |
| 0.31                                   | 96.81                                | 100.23 | 104.51 | 100.52 | 3.15 | 0                                   | 0     | 0     | 0.00  | 0.00 |
| 0.25                                   | 71.65                                | 70.97  | 68.17  | 70.26  | 1.51 | 0                                   | 0     | 0     | 0.00  | 0.00 |

Table SI 2: Number of live bacterial cells on the surface

|         |         | Number of live cells |      |       |       |       |       |       |         |
|---------|---------|----------------------|------|-------|-------|-------|-------|-------|---------|
| Trial # | Image # | 1.44                 | 1.29 | 0.87  | 0.64  | 0.40  | 0.31  | 0.25  | Control |
| Trial 1 | 1       | 3280                 | 957  | 14137 | 8449  | 10717 | 7389  | 5601  | 97244   |
|         | 2       | 2622                 | 2371 | 8300  | 33032 | 8029  | 16185 | 17346 | 128062  |
|         | 3       | 2417                 | 1797 | 10917 | 7041  | 9703  | 4646  | 25704 | 126095  |
|         | 4       | 4200                 | 4220 | 10064 | 5556  | 13589 | 20394 | 51329 | 112526  |
|         | 5       | 1778                 | 3807 | 4474  | 38095 | 12892 | 7316  | 56574 | 492016  |
|         | 6       | 2804                 | 1753 | 7780  | 6800  | 10032 | 12090 | 27212 | 379975  |
|         | 7       | 1483                 | 2991 | 5187  | 19528 | 8499  | 16079 | 22857 | 106426  |
|         | 8       | 2461                 | 4841 | 2568  | 16868 | 9472  | 31579 | 136   | 441967  |
|         | 9       | 1486                 | 1112 | 9895  | 21356 | 18836 | 11150 | 13213 | 218816  |
|         | 10      | 2623                 | 1399 | 6240  | 3279  | 32863 | 15344 | 57173 | 292345  |
| Trial 2 | 1       | 5426                 | 2249 | 12418 | 12274 | 34859 | 1295  | 2073  | 246323  |
|         | 2       | 5494                 | 2718 | 21431 | 19787 | 23664 | 1078  | 741   | 293742  |
|         | 3       | 2437                 | 6229 | 7255  | 20058 | 13208 | 6996  | 2705  | 266844  |
|         | 4       | 2799                 | 4203 | 5773  | 27729 | 10427 | 5085  | 51834 | 372875  |
|         | 5       | 1650                 | 1435 | 7651  | 17395 | 6337  | 5552  | 24890 | 333745  |
|         | 6       | 3101                 | 3380 | 27410 | 27509 | 6063  | 10241 | 16112 | 158558  |
|         | 7       | 11478                | 3440 | 10113 | 10197 | 8165  | 2846  | 95555 | 280018  |
|         | 8       | 11778                | 1451 | 6198  | 15430 | 28841 | 34065 | 33892 | 229920  |
|         | 9       | 6872                 | 1728 | 7082  | 14886 | 7258  | 972   | 5226  | 222791  |
|         | 10      | 7603                 | 5811 | 9487  | 9367  | 8673  | 14367 | 2609  | 255110  |
| Trial 3 | 1       | 4244                 | 1406 | 16131 | 9209  | 5767  | 20397 | 27880 | 339974  |
|         | 2       | 7564                 | 954  | 1524  | 29854 | 22392 | 5231  | 67712 | 291284  |
|         | 3       | 8297                 | 4576 | 5058  | 3969  | 6719  | 50500 | 21165 | 236734  |
|         | 4       | 5283                 | 649  | 1539  | 21227 | 5691  | 5007  | 3839  | 256938  |
|         | 5       | 2913                 | 2150 | 11668 | 16717 | 28559 | 9706  | 27183 | 262415  |
|         | 6       | 1097                 | 2268 | 17761 | 15632 | 13218 | 19585 | 92736 | 249740  |

|         |         | Number of live cells |      |       |      |       |        |       |         |
|---------|---------|----------------------|------|-------|------|-------|--------|-------|---------|
| Trial # | Image # | 1.44                 | 1.29 | 0.87  | 0.64 | 0.40  | 0.31   | 0.25  | Control |
|         | 7       | 7054                 | 2768 | 11974 | 8319 | 8929  | 102669 | 21608 | 201105  |
|         | 8       | 4791                 | 523  | 455   | 3785 | 50960 | 48680  | 22517 | 276970  |
|         | 9       | 4217                 | 1161 | 12457 | 5587 | 28456 | 35444  | 26597 | 330923  |
|         | 10      | 3637                 | 2899 | 3148  | 6618 | 14013 | 262    | 8510  | 323599  |

Table SI 3: Number of dead bacterial cells on the surface

|         |         | Number of dead cells |       |        |        |        |        |        |         |
|---------|---------|----------------------|-------|--------|--------|--------|--------|--------|---------|
| Trial # | Image # | 1.44                 | 1.29  | 0.87   | 0.64   | 0.40   | 0.31   | 0.25   | Control |
| Trial 1 | 1       | 25413                | 12825 | 153514 | 137248 | 37469  | 35651  | 52255  | 102     |
|         | 2       | 28140                | 15889 | 64878  | 17032  | 99318  | 57423  | 84574  | 1651    |
|         | 3       | 43363                | 41031 | 62281  | 37267  | 66137  | 15149  | 28071  | 523     |
|         | 4       | 48265                | 32355 | 103455 | 68460  | 51086  | 40377  | 161627 | 1199    |
|         | 5       | 45534                | 18191 | 65342  | 78365  | 55091  | 46917  | 68668  | 2636    |
|         | 6       | 23510                | 55115 | 124000 | 109167 | 68532  | 53077  | 64166  | 4129    |
|         | 7       | 45827                | 29827 | 114922 | 79093  | 157321 | 47217  | 37718  | 3237    |
|         | 8       | 41083                | 59615 | 24561  | 40006  | 49106  | 63160  | 24818  | 1835    |
|         | 9       | 41715                | 12552 | 147309 | 123104 | 60396  | 25389  | 14546  | 3894    |
|         | 10      | 33795                | 40562 | 100516 | 27482  | 16683  | 44120  | 81866  | 2002    |
| Trial 2 | 1       | 73009                | 58710 | 157751 | 49277  | 40131  | 10159  | 11161  | 1338    |
|         | 2       | 72974                | 12378 | 74995  | 88725  | 156488 | 14071  | 6760   | 467     |
|         | 3       | 26175                | 13944 | 196160 | 48586  | 50989  | 56773  | 13728  | 431     |
|         | 4       | 43996                | 28010 | 86814  | 91961  | 20455  | 17169  | 26165  | 252     |
|         | 5       | 13456                | 15536 | 195291 | 87187  | 66702  | 39169  | 22338  | 337     |
|         | 6       | 23739                | 90051 | 185914 | 102810 | 80899  | 9161   | 37483  | 2312    |
|         | 7       | 54306                | 77330 | 115730 | 94905  | 63476  | 11427  | 49610  | 2746    |
|         | 8       | 33835                | 72104 | 72206  | 58194  | 114062 | 21760  | 27937  | 342     |
|         | 9       | 39955                | 28663 | 87878  | 105206 | 83070  | 1106   | 56502  | 589     |
|         | 10      | 35509                | 73065 | 148035 | 89877  | 52891  | 64085  | 21136  | 182     |
| Trial 3 | 1       | 51717                | 18748 | 61676  | 44403  | 23452  | 12145  | 48085  | 283     |
|         | 2       | 76704                | 16380 | 10443  | 59104  | 26208  | 17484  | 116211 | 1593    |
|         | 3       | 45325                | 13676 | 58974  | 66770  | 62443  | 284578 | 22778  | 1102    |
|         | 4       | 43836                | 2350  | 130229 | 81034  | 52854  | 30193  | 16132  | 5571    |
|         | 5       | 44779                | 54115 | 259198 | 84470  | 94577  | 43639  | 26241  | 703     |
|         | 6       | 9198                 | 53572 | 147440 | 48409  | 106886 | 107760 | 3094   | 262     |
|         | 7       | 28976                | 33339 | 117862 | 84052  | 99635  | 276399 | 94859  | 686     |
|         | 8       | 109981               | 60725 | 19809  | 49862  | 89678  | 123293 | 71241  | 1078    |
|         | 9       | 38059                | 67393 | 73018  | 99367  | 93881  | 77991  | 38750  | 1988    |
|         | 10      | 22884                | 20739 | 225672 | 42420  | 104236 | 4412   | 71922  | 3716    |

Table SI 4: Total number of bacterial cells adhered on the surface

|         |         | Total number of adhered cells |       |        |        |        |       |        |         |
|---------|---------|-------------------------------|-------|--------|--------|--------|-------|--------|---------|
| Trial # | Image # | 1.44                          | 1.29  | 0.87   | 0.64   | 0.40   | 0.31  | 0.25   | Control |
| Trial 1 | 1       | 28693                         | 13782 | 167651 | 145697 | 48186  | 43040 | 57856  | 97346   |
|         | 2       | 30762                         | 18260 | 73178  | 50064  | 107347 | 73608 | 101920 | 129713  |

|         |         | Total number of adhered cells |       |        |        |        |        |        |         |        |
|---------|---------|-------------------------------|-------|--------|--------|--------|--------|--------|---------|--------|
| Trial # | Image # | 1.44                          | 1.29  | 0.87   | 0.64   | 0.40   | 0.31   | 0.25   | Control |        |
|         | 3       | 45780                         | 42828 | 73198  | 44308  | 75840  | 19795  | 53775  | 126618  |        |
|         | 4       | 52465                         | 36575 | 113519 | 74016  | 64675  | 60771  | 212956 | 113725  |        |
|         | 5       | 47312                         | 21998 | 69816  | 116460 | 67983  | 54233  | 125242 | 494652  |        |
|         | 6       | 26314                         | 56868 | 131780 | 115967 | 78564  | 65167  | 91378  | 384104  |        |
|         | 7       | 47310                         | 32818 | 120109 | 98621  | 165820 | 63296  | 60575  | 109663  |        |
|         | 8       | 43544                         | 64456 | 27129  | 56874  | 58578  | 94739  | 24954  | 443802  |        |
|         | 9       | 43201                         | 13664 | 157204 | 144460 | 79232  | 36539  | 27759  | 222710  |        |
|         | 10      | 36418                         | 41961 | 106756 | 30761  | 49546  | 59464  | 139039 | 294347  |        |
|         | Trial 2 | 1                             | 78435 | 60959  | 170169 | 61551  | 74990  | 11454  | 13234   | 247661 |
|         |         | 2                             | 78468 | 15096  | 96426  | 108512 | 180152 | 15149  | 7501    | 294209 |
| 3       |         | 28612                         | 20173 | 203415 | 68644  | 64197  | 63769  | 16433  | 267275  |        |
| 4       |         | 46795                         | 32213 | 92587  | 119690 | 30882  | 22254  | 77999  | 373127  |        |
| 5       |         | 15106                         | 16971 | 202942 | 104582 | 73039  | 44721  | 47228  | 334082  |        |
| 6       |         | 26840                         | 93431 | 213324 | 130319 | 86962  | 19402  | 53595  | 160870  |        |
| 7       |         | 65784                         | 80770 | 125843 | 105102 | 71641  | 14273  | 145165 | 282764  |        |
| 8       |         | 45613                         | 73555 | 78404  | 73624  | 142903 | 55825  | 61829  | 230262  |        |
| 9       |         | 46827                         | 30391 | 94960  | 120092 | 90328  | 2078   | 61728  | 223380  |        |
| 10      |         | 43112                         | 78876 | 157522 | 99244  | 61564  | 78452  | 23745  | 255292  |        |
| Trial 3 | 1       | 55961                         | 20154 | 77807  | 53612  | 29219  | 32542  | 75965  | 340257  |        |
|         | 2       | 84268                         | 17334 | 11967  | 88958  | 48600  | 22715  | 183923 | 292877  |        |
|         | 3       | 53622                         | 18252 | 64032  | 70739  | 69162  | 335078 | 43943  | 237836  |        |
|         | 4       | 49119                         | 2999  | 131768 | 102261 | 58545  | 35200  | 19971  | 262509  |        |
|         | 5       | 47692                         | 56265 | 270866 | 101187 | 123136 | 53345  | 53424  | 263118  |        |
|         | 6       | 10295                         | 55840 | 165201 | 64041  | 120104 | 127345 | 95830  | 250002  |        |
|         | 7       | 36030                         | 36107 | 129836 | 92371  | 108564 | 379068 | 116467 | 201791  |        |
|         | 8       | 114772                        | 61248 | 20264  | 53647  | 140638 | 171973 | 93758  | 278048  |        |
|         | 9       | 42276                         | 68554 | 85475  | 104954 | 122337 | 113435 | 65347  | 332911  |        |
|         | 10      | 26521                         | 23638 | 228820 | 49038  | 118249 | 4674   | 80432  | 327315  |        |

Table SI 5: Bactericidal efficacy demonstrated by each surface

|          |         | Bactericidal efficacy |      |      |      |      |      |      |         |
|----------|---------|-----------------------|------|------|------|------|------|------|---------|
| Trial #  | Image # | 1.44                  | 1.29 | 0.87 | 0.64 | 0.40 | 0.31 | 0.25 | Control |
| Trial 1  | 1       | 88.6                  | 93.1 | 91.6 | 94.2 | 77.8 | 82.8 | 90.3 | 0.1     |
|          | 2       | 91.5                  | 87   | 88.7 | 34   | 92.5 | 78   | 83   | 1.3     |
|          | 3       | 94.7                  | 95.8 | 85.1 | 84.1 | 87.2 | 76.5 | 52.2 | 0.4     |
|          | 4       | 92                    | 88.5 | 91.1 | 92.5 | 79   | 66.4 | 75.9 | 1.1     |
|          | 5       | 96.2                  | 82.7 | 93.6 | 67.3 | 81   | 86.5 | 54.8 | 0.5     |
|          | 6       | 89.3                  | 96.9 | 94.1 | 94.1 | 87.2 | 81.4 | 70.2 | 1.1     |
|          | 7       | 96.9                  | 90.9 | 95.7 | 80.2 | 94.9 | 74.6 | 62.3 | 3       |
|          | 8       | 94.3                  | 92.5 | 90.5 | 70.3 | 83.8 | 66.7 | 99.5 | 0.4     |
|          | 9       | 96.6                  | 91.9 | 93.7 | 85.2 | 76.2 | 69.5 | 52.4 | 1.7     |
|          | 10      | 92.8                  | 96.7 | 94.2 | 89.3 | 33.7 | 74.2 | 58.9 | 0.7     |
| Trial 12 | 1       | 93.1                  | 96.3 | 92.7 | 80.1 | 53.5 | 88.7 | 84.3 | 0.5     |

|                |                | <b>Bactericidal efficacy</b> |             |             |             |             |             |             |                |
|----------------|----------------|------------------------------|-------------|-------------|-------------|-------------|-------------|-------------|----------------|
| <b>Trial #</b> | <b>Image #</b> | <b>1.44</b>                  | <b>1.29</b> | <b>0.87</b> | <b>0.64</b> | <b>0.40</b> | <b>0.31</b> | <b>0.25</b> | <b>Control</b> |
|                | 2              | 93                           | 82          | 77.8        | 81.8        | 86.9        | 92.9        | 90.1        | 0.2            |
|                | 3              | 91.5                         | 69.1        | 96.4        | 70.8        | 79.4        | 89          | 83.5        | 0.2            |
|                | 4              | 94                           | 87          | 93.8        | 76.8        | 66.2        | 77.2        | 33.5        | 0.1            |
|                | 5              | 89.1                         | 91.5        | 96.2        | 83.4        | 91.3        | 87.6        | 47.3        | 0.1            |
|                | 6              | 88.4                         | 96.4        | 87.2        | 78.9        | 93          | 47.2        | 69.9        | 1.4            |
|                | 7              | 82.6                         | 95.7        | 92          | 90.3        | 88.6        | 80.1        | 34.2        | 1              |
|                | 8              | 74.2                         | 98          | 92.1        | 79          | 79.8        | 39          | 45.2        | 0.1            |
|                | 9              | 85.3                         | 94.3        | 92.5        | 87.6        | 92          | 53.2        | 91.5        | 0.3            |
|                | 10             | 82.4                         | 92.6        | 94          | 90.6        | 85.9        | 81.7        | 89          | 0.1            |
|                | <b>Trial 3</b> | 1                            | 92.4        | 93          | 79.3        | 82.8        | 80.3        | 37.3        | 63.3           |
| 2              |                | 91                           | 94.5        | 87.3        | 66.4        | 53.9        | 77          | 63.2        | 0.5            |
| 3              |                | 84.5                         | 74.9        | 92.1        | 94.4        | 90.3        | 84.9        | 51.8        | 0.5            |
| 4              |                | 89.2                         | 78.4        | 98.8        | 79.2        | 90.3        | 85.8        | 80.8        | 2.1            |
| 5              |                | 93.9                         | 96.2        | 95.7        | 83.5        | 76.8        | 81.8        | 49.1        | 0.3            |
| 6              |                | 89.3                         | 95.9        | 89.2        | 75.6        | 89          | 84.6        | 3.2         | 0.1            |
| 7              |                | 80.4                         | 92.3        | 90.8        | 91          | 91.8        | 72.9        | 81.4        | 0.3            |
| 8              |                | 95.8                         | 99.1        | 97.8        | 92.9        | 63.8        | 71.7        | 76          | 0.4            |
| 9              |                | 90                           | 98.3        | 85.4        | 94.7        | 76.7        | 68.8        | 59.3        | 0.6            |
| 10             |                | 86.3                         | 87.7        | 98.6        | 86.5        | 88.1        | 94.4        | 89.4        | 1.1            |

Table SI 6: Arithmetic average surface roughness Ra values obtained with AFM

| <b>Group</b>                         | <b>Arithmetic average surface roughness Ra (nm)</b> |                  |                  |             |
|--------------------------------------|-----------------------------------------------------|------------------|------------------|-------------|
|                                      | <b>Sample #1</b>                                    | <b>Sample #2</b> | <b>Sample #3</b> | <b>Mean</b> |
| 1.44 $\mu\text{m}$ without nanowires | 78.20                                               | 52.60            | 133.00           | 87.93       |
| 1.44 $\mu\text{m}$ with nanowires    | 134.00                                              | 139.00           | 91.00            | 121.33      |
| 1.29 $\mu\text{m}$ without nanowires | 166.00                                              | 52.10            | 31.80            | 83.30       |
| 1.29 $\mu\text{m}$ with nanowires    | 160.00                                              | 110.00           | 147.00           | 139.00      |
| 0.87 $\mu\text{m}$ without nanowires | 68.00                                               | 87.90            | 35.30            | 63.73       |
| 0.87 $\mu\text{m}$ with nanowires    | 117.00                                              | 94.80            | 87.20            | 99.67       |
| 0.64 $\mu\text{m}$ without nanowires | 46.30                                               | 66.50            | 59.00            | 57.27       |
| 0.64 $\mu\text{m}$ with nanowires    | 88.40                                               | 95.80            | 85.00            | 89.73       |
| 0.40 $\mu\text{m}$ without nanowires | 60.10                                               | 41.50            | 33.30            | 44.97       |
| 0.40 $\mu\text{m}$ with nanowires    | 81.70                                               | 110.00           | 69.20            | 86.97       |
| 0.31 $\mu\text{m}$ without nanowires | 68.60                                               | 48.90            | 59.20            | 58.90       |
| 0.31 $\mu\text{m}$ with nanowires    | 110.00                                              | 85.70            | 76.10            | 90.60       |
| 0.25 $\mu\text{m}$ without nanowires | 2.27                                                | 2.64             | 1.87             | 2.26        |
| 0.25 $\mu\text{m}$ with nanowires    | 38.70                                               | 37.90            | 39.50            | 38.70       |

Table SI 7: Root mean square roughness Ra values obtained with AFM

| <b>Group</b>                         | <b>Root mean square roughness Rq (nm)</b> |                  |                  |             |
|--------------------------------------|-------------------------------------------|------------------|------------------|-------------|
|                                      | <b>Sample #1</b>                          | <b>Sample #2</b> | <b>Sample #3</b> | <b>Mean</b> |
| 1.44 $\mu\text{m}$ without nanowires | 92.20                                     | 63.80            | 152.00           | 102.67      |
| 1.44 $\mu\text{m}$ with nanowires    | 174.00                                    | 194.00           | 116.00           | 161.33      |
| 1.29 $\mu\text{m}$ without nanowires | 197.00                                    | 77.00            | 40.10            | 104.70      |

| Group                                | Root mean square roughness Rq (nm) |           |           |        |
|--------------------------------------|------------------------------------|-----------|-----------|--------|
|                                      | Sample #1                          | Sample #2 | Sample #3 | Mean   |
| 1.29 $\mu\text{m}$ with nanowires    | 211.00                             | 139.00    | 188.00    | 179.33 |
| 0.87 $\mu\text{m}$ without nanowires | 87.20                              | 103.00    | 45.70     | 78.63  |
| 0.87 $\mu\text{m}$ with nanowires    | 146.00                             | 120.00    | 114.00    | 126.67 |
| 0.64 $\mu\text{m}$ without nanowires | 57.40                              | 85.10     | 78.60     | 73.70  |
| 0.64 $\mu\text{m}$ with nanowires    | 110.00                             | 118.00    | 107.00    | 111.67 |
| 0.40 $\mu\text{m}$ without nanowires | 72.80                              | 52.40     | 45.10     | 56.77  |
| 0.40 $\mu\text{m}$ with nanowires    | 107.00                             | 138.00    | 86.40     | 110.47 |
| 0.31 $\mu\text{m}$ without nanowires | 83.40                              | 58.80     | 74.40     | 72.20  |
| 0.31 $\mu\text{m}$ with nanowires    | 136.00                             | 107.00    | 95.00     | 112.67 |
| 0.25 $\mu\text{m}$ without nanowires | 3.77                               | 4.34      | 3.34      | 3.82   |
| 0.25 $\mu\text{m}$ with nanowires    | 49.40                              | 48.30     | 51.20     | 49.63  |

Table SI 8: Skewness values obtained with AFM

| Group                                | Skewness  |           |           |        |
|--------------------------------------|-----------|-----------|-----------|--------|
|                                      | Sample #1 | Sample #2 | Sample #3 | Mean   |
| 1.44 $\mu\text{m}$ without nanowires | -0.290    | -0.364    | 0.382     | -0.091 |
| 1.44 $\mu\text{m}$ with nanowires    | 0.918     | 1.340     | 0.581     | 0.946  |
| 1.29 $\mu\text{m}$ without nanowires | -0.373    | 1.470     | 0.155     | 0.417  |
| 1.29 $\mu\text{m}$ with nanowires    | 0.343     | 0.206     | 0.658     | 0.402  |
| 0.87 $\mu\text{m}$ without nanowires | 0.218     | 0.125     | -0.716    | -0.124 |
| 0.87 $\mu\text{m}$ with nanowires    | 0.442     | 0.243     | 0.826     | 0.504  |
| 0.64 $\mu\text{m}$ without nanowires | -0.463    | 0.077     | -1.400    | -0.595 |
| 0.64 $\mu\text{m}$ with nanowires    | 0.191     | 0.054     | 0.320     | 0.188  |
| 0.40 $\mu\text{m}$ without nanowires | 0.210     | -0.343    | -1.050    | -0.394 |
| 0.40 $\mu\text{m}$ with nanowires    | -0.671    | -0.244    | 0.133     | -0.261 |
| 0.31 $\mu\text{m}$ without nanowires | -0.132    | -0.324    | -0.180    | -0.212 |
| 0.31 $\mu\text{m}$ with nanowires    | 0.136     | 0.267     | 0.367     | 0.257  |
| 0.25 $\mu\text{m}$ without nanowires | 4.580     | 4.740     | 3.510     | 4.277  |
| 0.25 $\mu\text{m}$ with nanowires    | 0.514     | 0.458     | 0.772     | 0.581  |

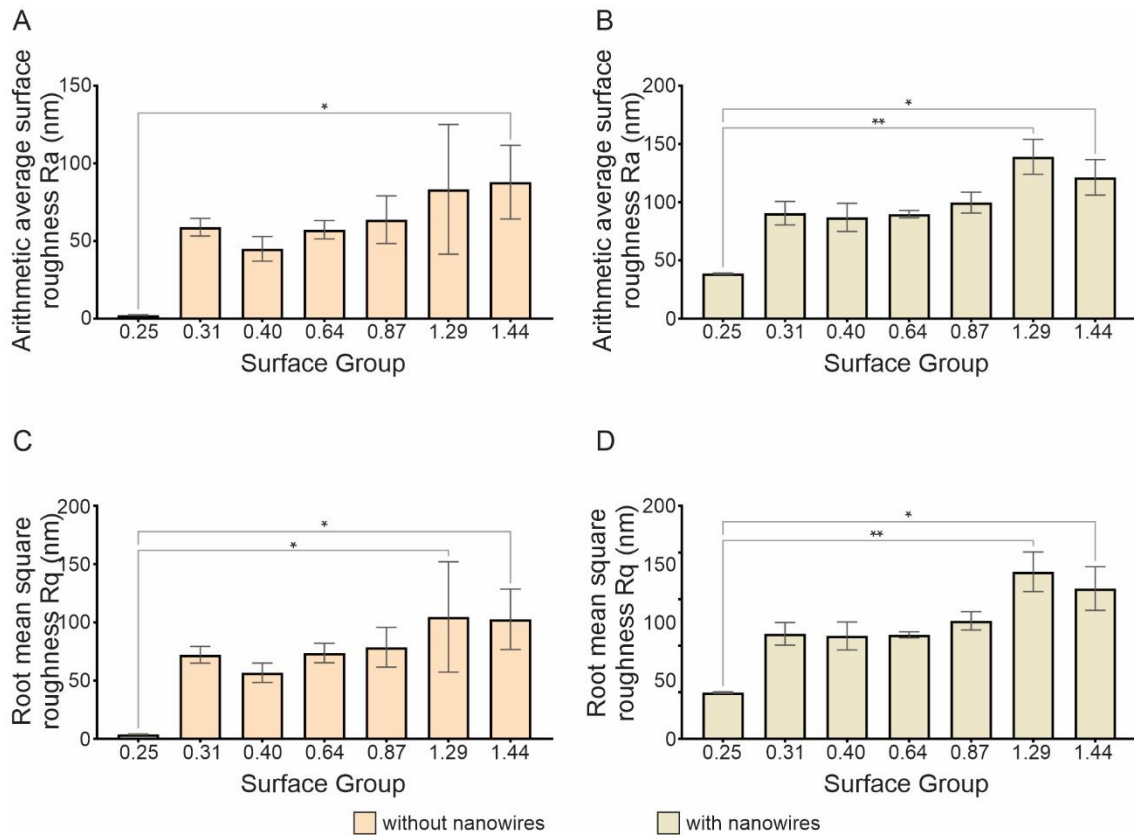

Figure SI 1: Surface characterisation with Arithmetic average surface roughness (Ra), and Root mean square roughness (Rq). (A) Ra values of flat surfaces (without nanowires), (B) Ra values of nanowire structured surfaces, (C) Rq values of flat surfaces (without nanowires), and (D) Rq values of nanowire structured surfaces. \* shows statistical significance with ANOVA. ns: Pairs with no significant ( $P > 0.05$ ) difference (not marked), \*:  $P \leq 0.05$ , \*\*:  $P \leq 0.01$ , \*\*\*:  $P \leq 0.001$ , and \*\*\*\*:  $P \leq 0.0001$ .
